# Supplementary material for: Maternal Depression Affects Infants’ Lexical Processing Abilities in the Second Year of Life
Source: PubMed Central journal article supplement (PMC7763905; doi:10.3390/brainsci10120977), 2020-12-12
Supplement: brainsci-10-00977-s001.pdf [file brainsci-10-00977-s001.pdf]

## Supplementary Files

**Table S1.** Maternal depression and anxiety scores in the control and risk groups.

| Descriptive statistics |           | Group         |               | <i>t</i> | <i>df</i> | <i>p</i> |
|------------------------|-----------|---------------|---------------|----------|-----------|----------|
|                        |           | Control       | Risk          |          |           |          |
| 6-month assessment     |           | <i>n</i> = 18 | <i>n</i> = 15 |          |           |          |
| Depression             | Range     | 0 - 11        | 0 - 28        |          |           |          |
|                        | Mean (SD) | 4.67(3.48)    | 8.87 (7.59)   | -2.103   | 31        | .044     |
|                        | %         | 0             | 20            |          |           |          |
| Anxiety                | Range     | 21 - 39       | 22 - 47       |          |           |          |
|                        | Mean (SD) | 29.61 (6.02)  | 31.80 (8.091) | -.890    | ?         | .380     |
|                        | %         | 0             | 15            |          |           |          |
| 9-month assessment     |           | <i>n</i> = 21 | <i>n</i> = 19 |          |           |          |
| Depression             | Range     | 0 - 13        | 0 - 21        |          |           |          |
|                        | Mean (SD) | 4.71 (4.27)   | 9.00 (7.71)   | -2.144   | 27.46     | .041     |
|                        | %         | 0             | 32            |          |           |          |
| Anxiety                | Range     | 20 - 46       | 21 - 55       |          |           |          |
|                        | Mean (SD) | 29.62 (6.76)  | 35.63 (9.06)  | -2.393   | 38        | .022     |
|                        | %         | 5             | 32            |          |           |          |
| 12-month assessment    |           | <i>n</i> = 24 | <i>n</i> = 19 |          |           |          |
| Depression             | Range     | 0 - 13        | 0 - 27        |          |           |          |
|                        | Mean (SD) | 4.54 (4.02)   | 10.26 (8.02)  | -2.840   | 25.10     | .009     |
|                        | %         | 0             | 26            |          |           |          |
| Anxiety                | Range     | 21 - 37       | 20 - 51       |          |           |          |
|                        | Mean (SD) | 27.88 (4.76)  | 36.00 (9.27)  | -3.474   | 25.42     | .002     |
|                        | %         | 0             | 37            |          |           |          |
| 18-month assessment    |           | <i>n</i> = 23 | <i>n</i> = 20 |          |           |          |
| Depression             | Range     | 0 - 20        | 0 - 26        |          |           |          |
|                        | Mean (SD) | 5.09 (4.60)   | 9.20 (8.46)   | -4.113   | 28.41     | .062     |
|                        | %         | 4             | 20            |          |           |          |
| Anxiety                | Range     | 20 - 42       | 20 - 62       |          |           |          |
|                        | Mean (SD) | 28.39 (6.65)  | 34.58 (11.48) | -2.111   | 29.54     | .043     |
|                        | %         | 4             | 25            |          |           |          |
| Mean postnatal score   |           | <i>n</i> = 25 | <i>n</i> = 21 |          |           |          |
| Depression             | Range     | 0 - 13        | 0 - 22.5      |          |           |          |
|                        | Mean (SD) | 4.63 (3.61)   | 9.22 (6.97)   | -2.685   | 26.81     | .012     |
| Anxiety                | Range     | 20.75 - 39.67 | 21 - 45       |          |           |          |
|                        | Mean (SD) | 28.32 (4.91)  | 34.58 (7.56)  | -3.221   | 30.85     | .003     |

*Note.* Depression = CESD-R scores; Anxiety = STAI scores; % = the percentage of mothers with scores at or above the clinical threshold. The mean depression and anxiety scores differ from the cut off scores described in the group allocation criteria as they reflect the average score obtained across the four assessment time points.

**Table S2.** Acoustic analysis of auditory stimuli.

| <b>Audio stimuli</b> | <b>F0<br/>Mean</b> | <b>F0<br/>Minimum</b> | <b>F0<br/>Maximum</b> | <b>Target word<br/>Duration (Ss)</b> |
|----------------------|--------------------|-----------------------|-----------------------|--------------------------------------|
| Look at the ball     | 336.20             | 168.79                | 480.09                | 0.55                                 |
| Look at the book     | 315.29             | 175.04                | 523.88                | 0.47                                 |
| Look at the car      | 351.04             | 163.61                | 489.15                | 0.58                                 |
| Look at the cup      | 332.74             | 175.71                | 522.07                | 0.46                                 |
| Look at the hat      | 330.45             | 194.33                | 502.10                | 0.56                                 |
| Look at the shoe     | 312.72             | 147.73                | 492.46                | 0.62                                 |
| Where is the ball    | 304.13             | 79.32                 | 447.90                | 0.61                                 |
| Where is the book    | 315.40             | 205.26                | 515.13                | 0.44                                 |
| Where is the car     | 287.85             | 148.85                | 423.22                | 0.65                                 |
| Where is the cup     | 355.72             | 214.39                | 524.28                | 0.40                                 |
| Where is the hat     | 362.54             | 216.69                | 511.25                | 0.60                                 |
| Where is the shoe    | 322.11             | 163.12                | 439.58                | 0.62                                 |
| Filler-Look          | 312.03             | 184.15                | 526.11                | NA                                   |
| Filler-Wow           | 257.28             | 173.89                | 355.55                | NA                                   |

*Note.* Ss = Seconds.
